# Supplementary material for: Impact of histological subtype on survival in patients with locally advanced cervical cancer that were treated with definitive radiotherapy: adenocarcinoma/adenosquamous carcinoma versus squamous cell carcinoma
Source: PubMed Central journal article supplement — J Gynecol Oncol. 2016 Dec 8;28(2):e19. doi: 10.3802/jgo.2017.28.e19 (PMC5323286; doi:10.3802/jgo.2017.28.e19), 2016-12-08
Supplement: jgo-28-e19-s001.pdf [file jgo-28-e19-s001.pdf]

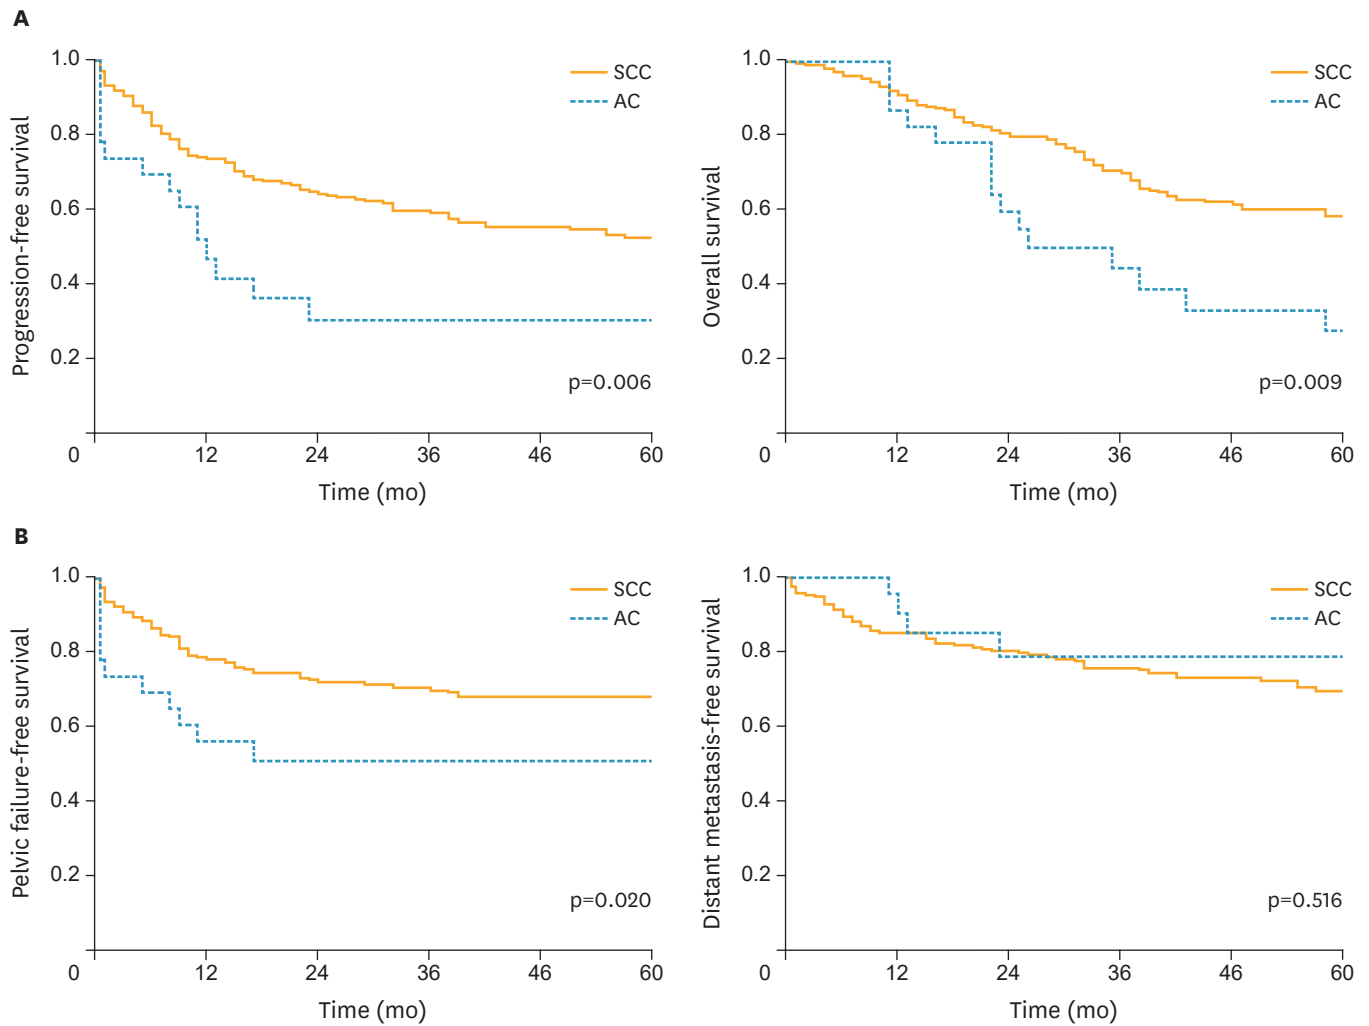

**Supplementary Fig. 1.** Clinical implications of AC histology in locally advanced cervical cancer patients. Kaplan-Meier estimates of survival according to the histological subtype. (A) PFS and OS (all patients; SCC, n=225; AC, n=23). (B) PFFS and DMFS (all patients; SCC, n=225; AC, n=23).

AC, adenocarcinoma; DMFS, distant metastasis-free survival; OS, overall survival; PFFS, pelvic failure-free survival; PFS, progression-free survival; SCC, squamous cell carcinoma.
