# Supplementary material for: Impact of histological subtype on survival in patients with locally advanced cervical cancer that were treated with definitive radiotherapy: adenocarcinoma/adenosquamous carcinoma versus squamous cell carcinoma
Source: PubMed Central journal article supplement — J Gynecol Oncol. 2016 Dec 8;28(2):e19. doi: 10.3802/jgo.2017.28.e19 (PMC5323286; doi:10.3802/jgo.2017.28.e19), 2016-12-08
Supplement: jgo-28-e19-s002.pdf [file jgo-28-e19-s002.pdf]

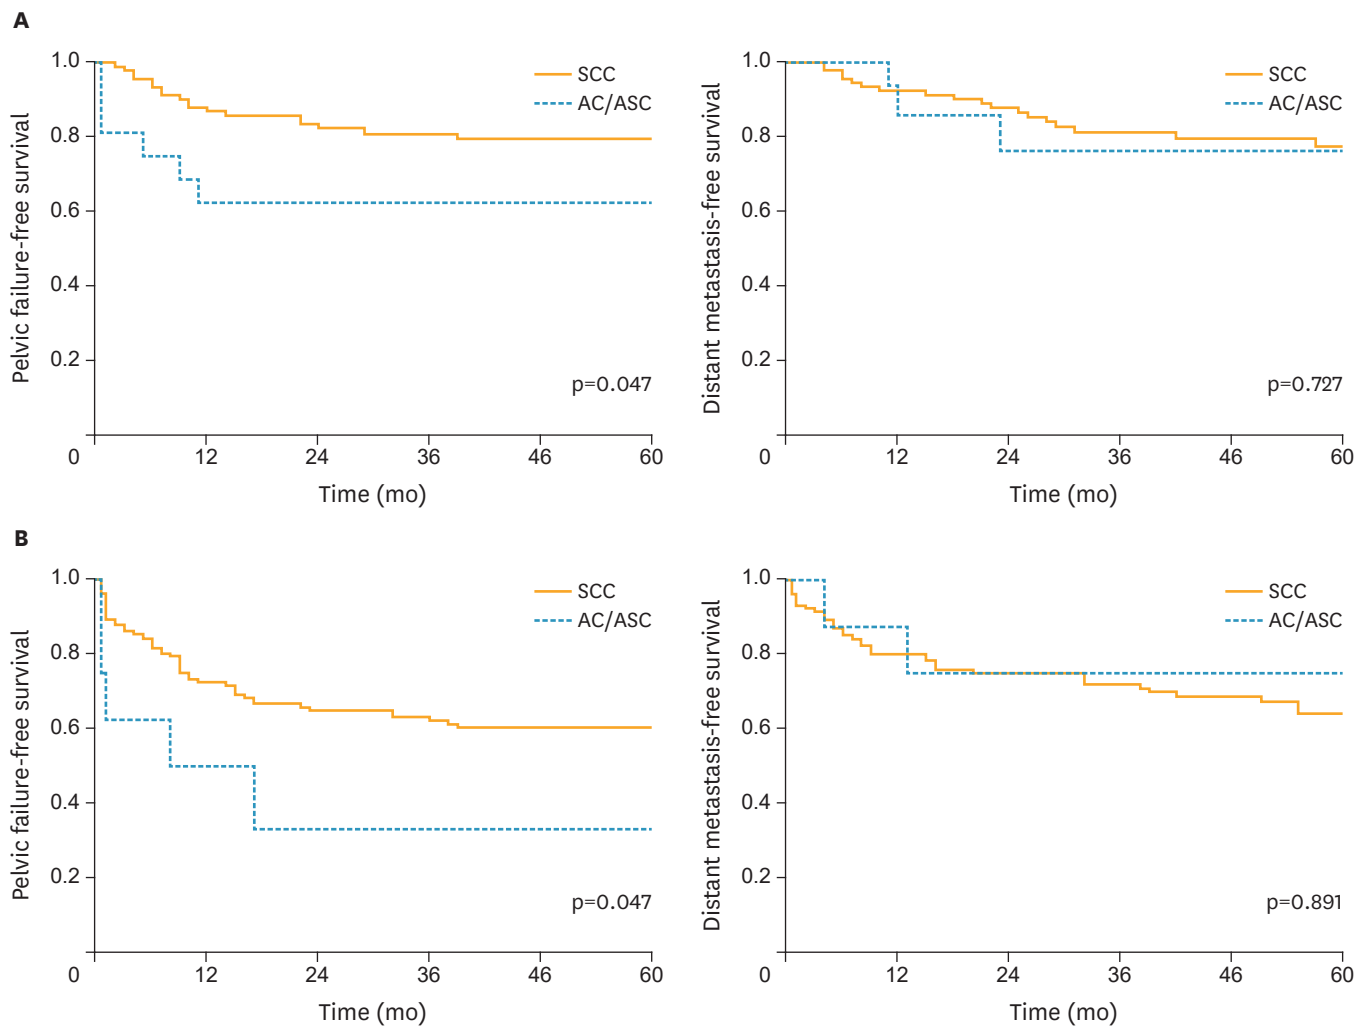

**Supplementary Fig. 2.** Kaplan-Meier estimates of PFFS and DMFS between the patients with AC/ASC and SCC histology. AC/ASC histology was associated with significantly shorter PFFS. However, DMFS was not affected by histology. (A) Stage IIB-III A patients. (B) Stage III B-IV A patients. AC, adenocarcinoma; ASC, adenosquamous carcinoma; DMFS, distant metastasis-free survival; PFFS, pelvic failure-free survival; SCC, squamous cell carcinoma.
