# Supplementary material for: Impact of histological subtype on survival in patients with locally advanced cervical cancer that were treated with definitive radiotherapy: adenocarcinoma/adenosquamous carcinoma versus squamous cell carcinoma
Source: PubMed Central journal article supplement — J Gynecol Oncol. 2016 Dec 8;28(2):e19. doi: 10.3802/jgo.2017.28.e19 (PMC5323286; doi:10.3802/jgo.2017.28.e19), 2016-12-08
Supplement: jgo-28-e19-s003.pdf [file jgo-28-e19-s003.pdf]

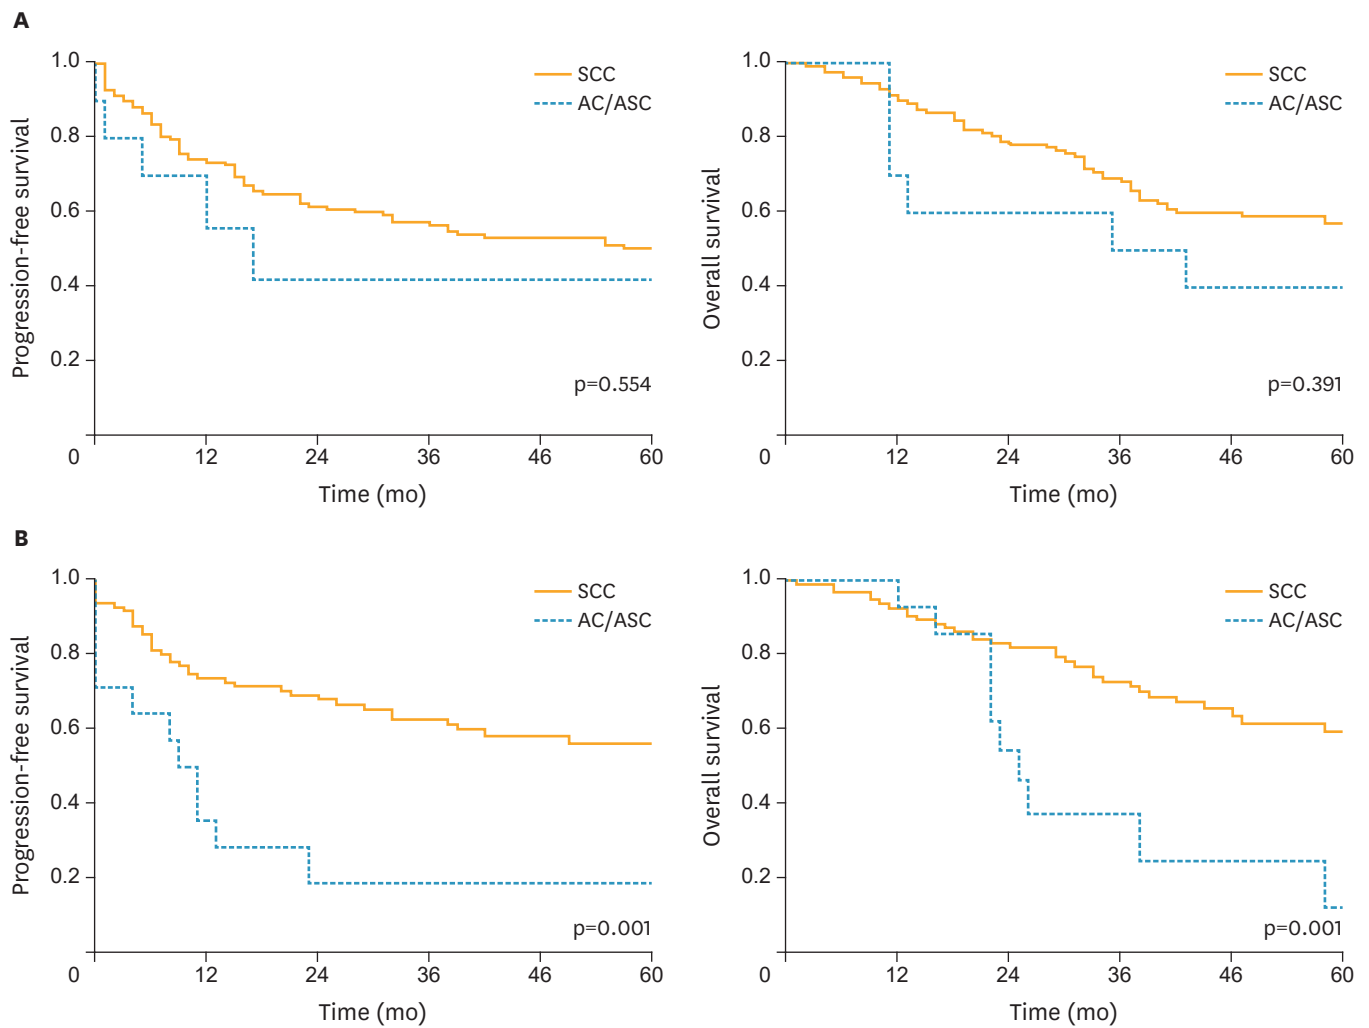

**Supplementary Fig. 2.** Survival difference between the patients with AC/ASC and SCC histology according to the type of radiotherapy administered. Kaplan-Meier estimates of survival according to the histological subtype. (A) Patients treated with definitive RT alone: AC/ASC histology exhibited similar PFS ( $p=0.5542$ ) and OS ( $p=0.3913$ ) to those with SCC histology. (B) Patients treated with CCRT: AC/ASC histology demonstrated significantly shorter PFS ( $p=0.0004$ ) and OS ( $p=0.0011$ ) than those with SCC histology.

AC, adenocarcinoma; ASC, adenosquamous carcinoma; CCRT, concurrent chemoradiotherapy; OS, overall survival; PFS, progression-free survival; RT, radiotherapy; SCC, squamous cell carcinoma.
